# Supplementary material for: Eosinophil-derived CCL-6 impairs hematopoietic stem cell homeostasis
Source: PubMed Central journal article supplement (PMC5835778; doi:10.1038/cr.2018.2), 2018-01-12

Supplementary Figure S2 FACS staining and analysis procedure of HSC cells.

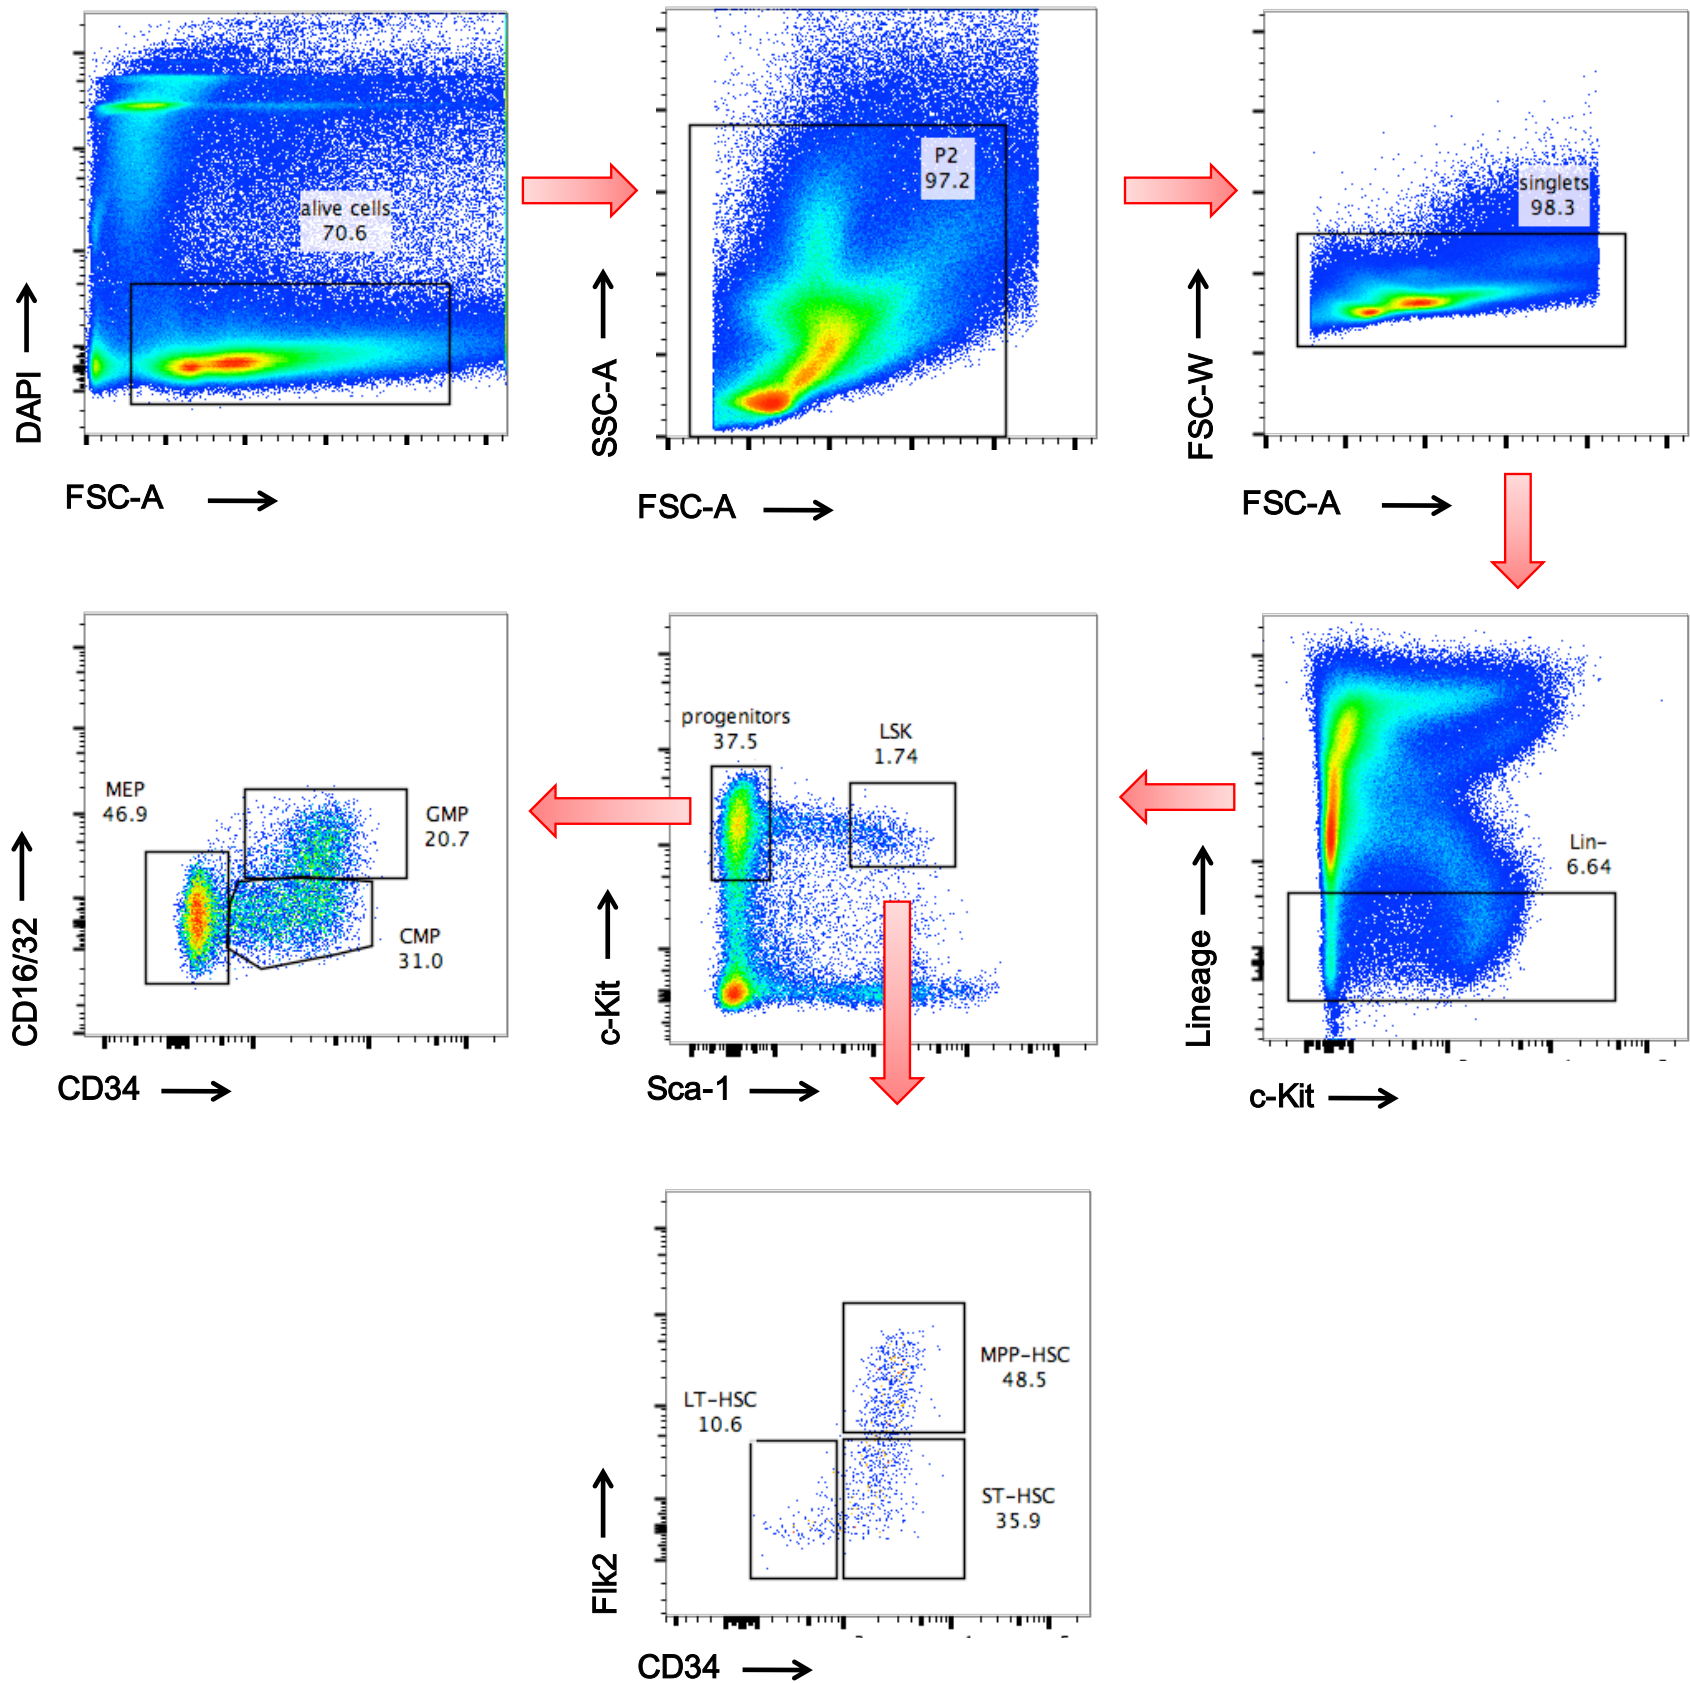

Supplement: cr20182x2.pdf [file cr20182x2.pdf]
