# Supplementary material for: Eosinophil-derived CCL-6 impairs hematopoietic stem cell homeostasis
Source: PubMed Central journal article supplement (PMC5835778; doi:10.1038/cr.2018.2), 2018-01-12
Supplement: cr20182x4.pdf [file cr20182x4.pdf]

Supplementary Figure 4: Eos depletion rescues the HSC defect in *IL-5* Tg mice.

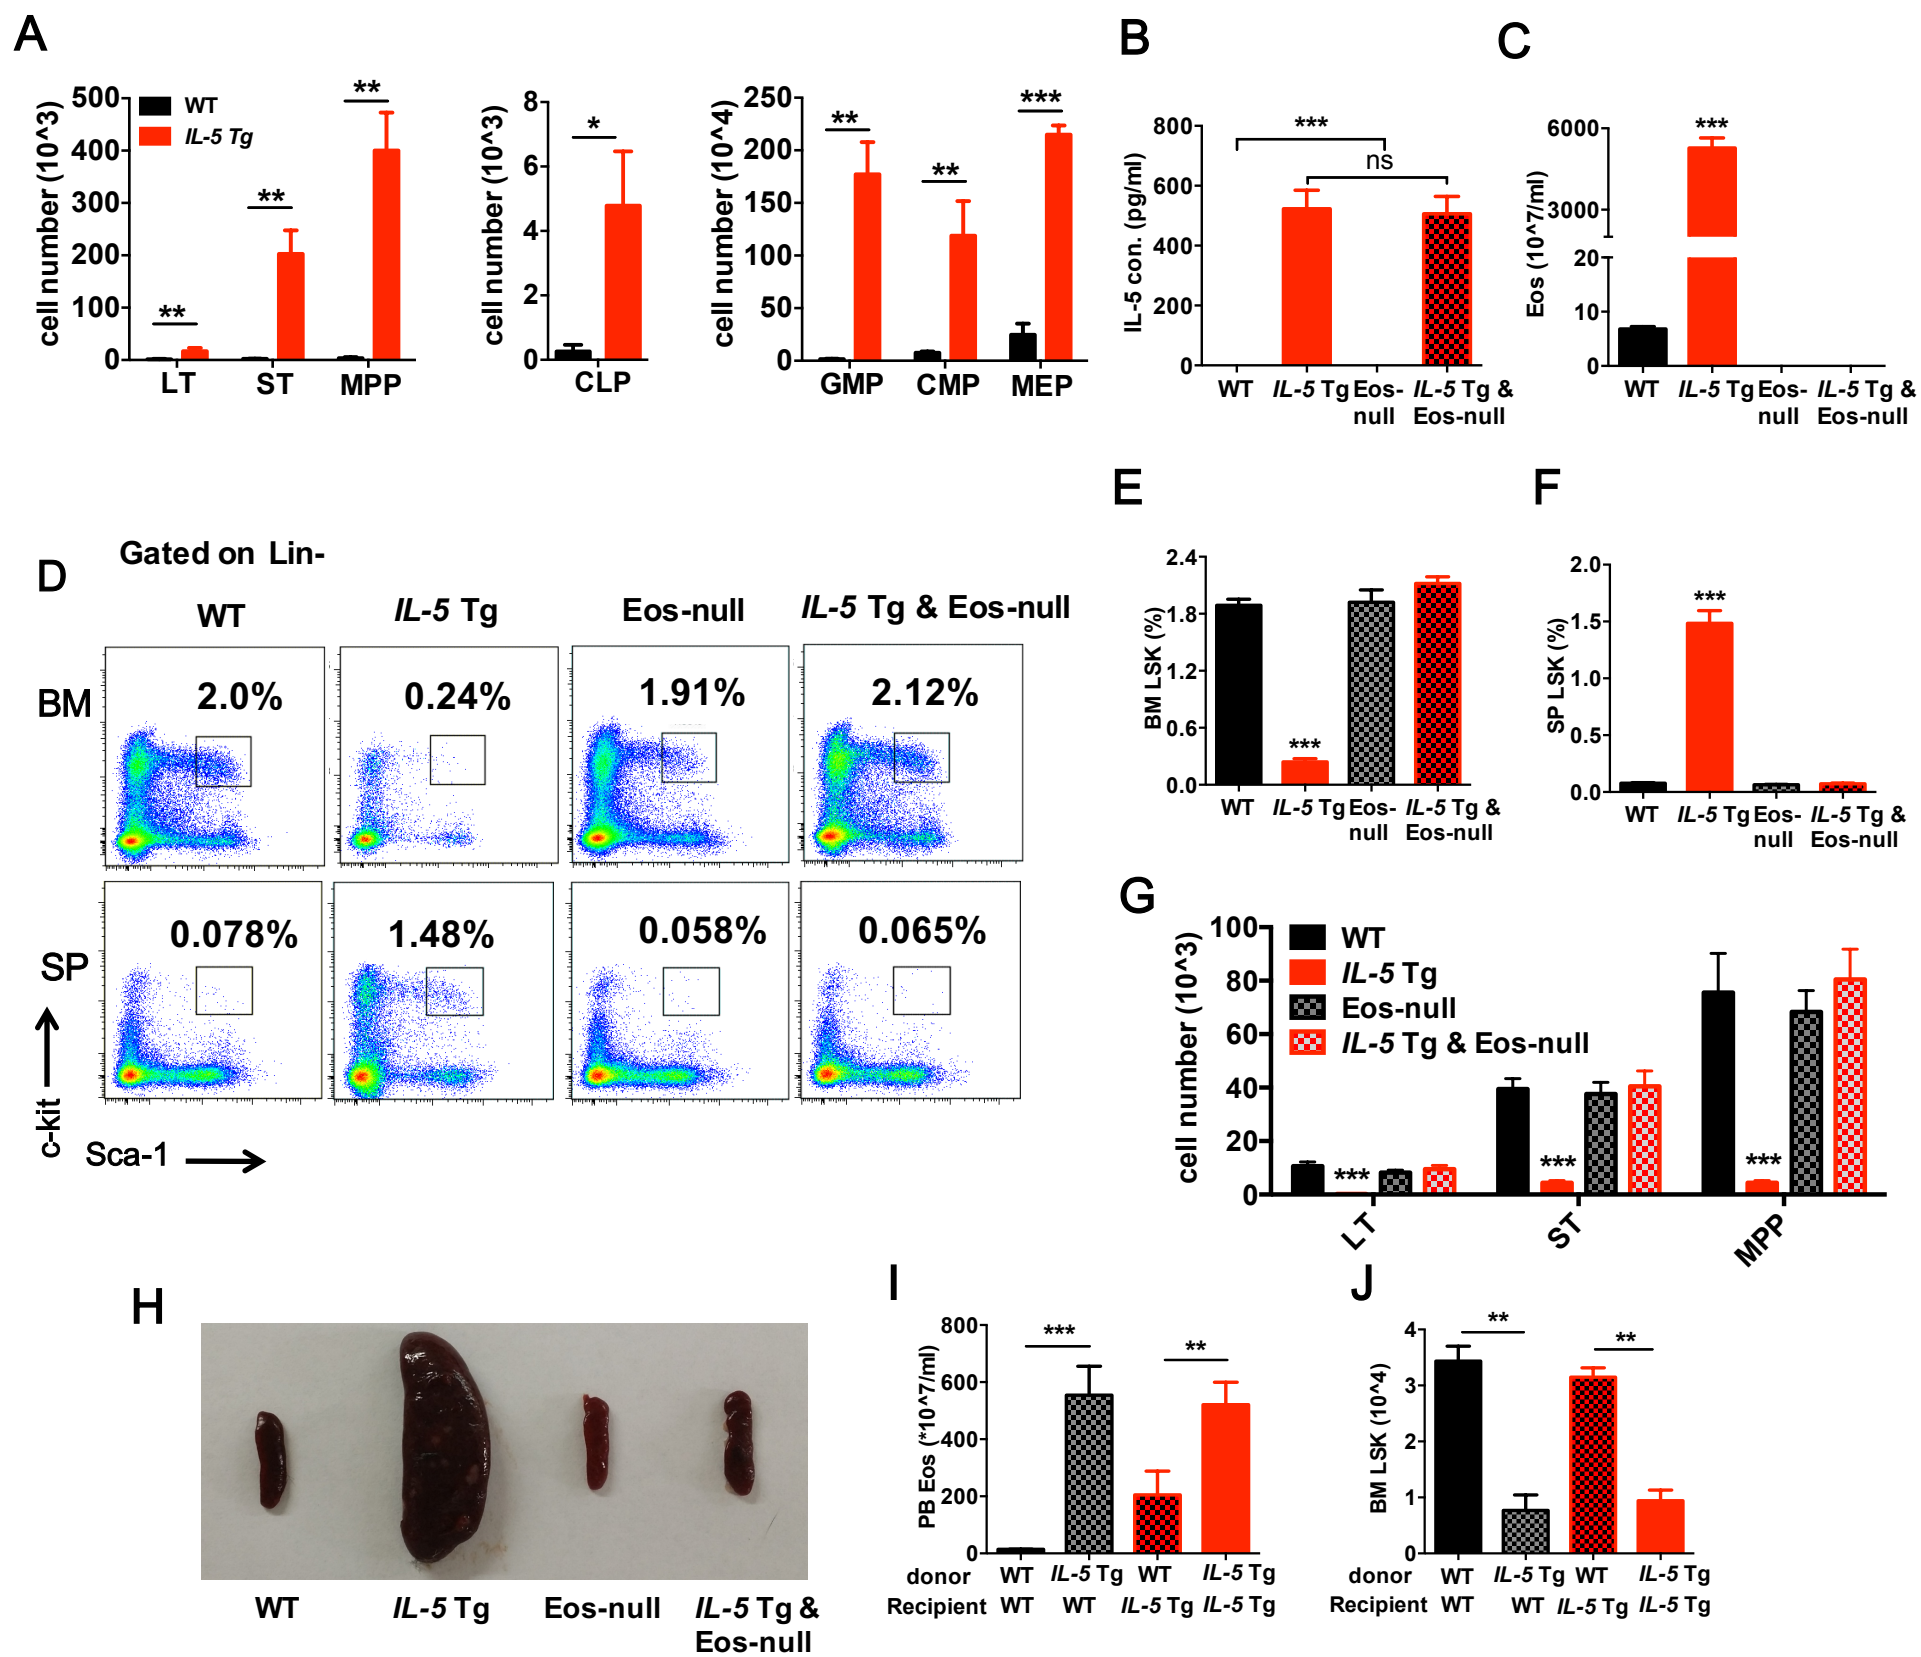

**Supplemental Figure S4** Eos depletion rescues the HSC defect in Il-5 Tg mice.

(A) Quantification numbers of stem cells and progenitor cells population by FACS analysis in the SP of Il-5 Tg mice and their littermates. (B) IL-5 levels in the serum determined by ELISA in Il-5 Tg mice. (C) Eos quantification in the peripheral blood (PB) analyzed by FACS and white blood cell (WBC) count. (D) Representative FACS plots of LSKs from the BM and SP in Il-5 Tg mice crossed with Eos-null mice. (E, F) Percentage of LSKs in the Lin- cells in the BM and SP. (G) Absolute numbers of stem cells in the BM of Il-5 Tg and Eos-null crossed mice. (H) Spleen appearance. (I, J) Absolute numbers of Eos in the PB and LSKs in the BM by FACS analysis after a 12-week noncompetitive transplantation. Data are shown as the means  $\pm$  SEM with at least 6 samples per group. \* $p < 0.05$ , \*\* $p < 0.01$ , \*\*\* $p < 0.001$  versus respective controls.
