# Supplementary material for: Eosinophil-derived CCL-6 impairs hematopoietic stem cell homeostasis
Source: PubMed Central journal article supplement (PMC5835778; doi:10.1038/cr.2018.2), 2018-01-12
Supplement: cr20182x5.pdf [file cr20182x5.pdf]

Supplementary Figure 5: Eos-induced intracellular ROS accumulation in HSCs is responsible for disrupted HSC homeostasis.

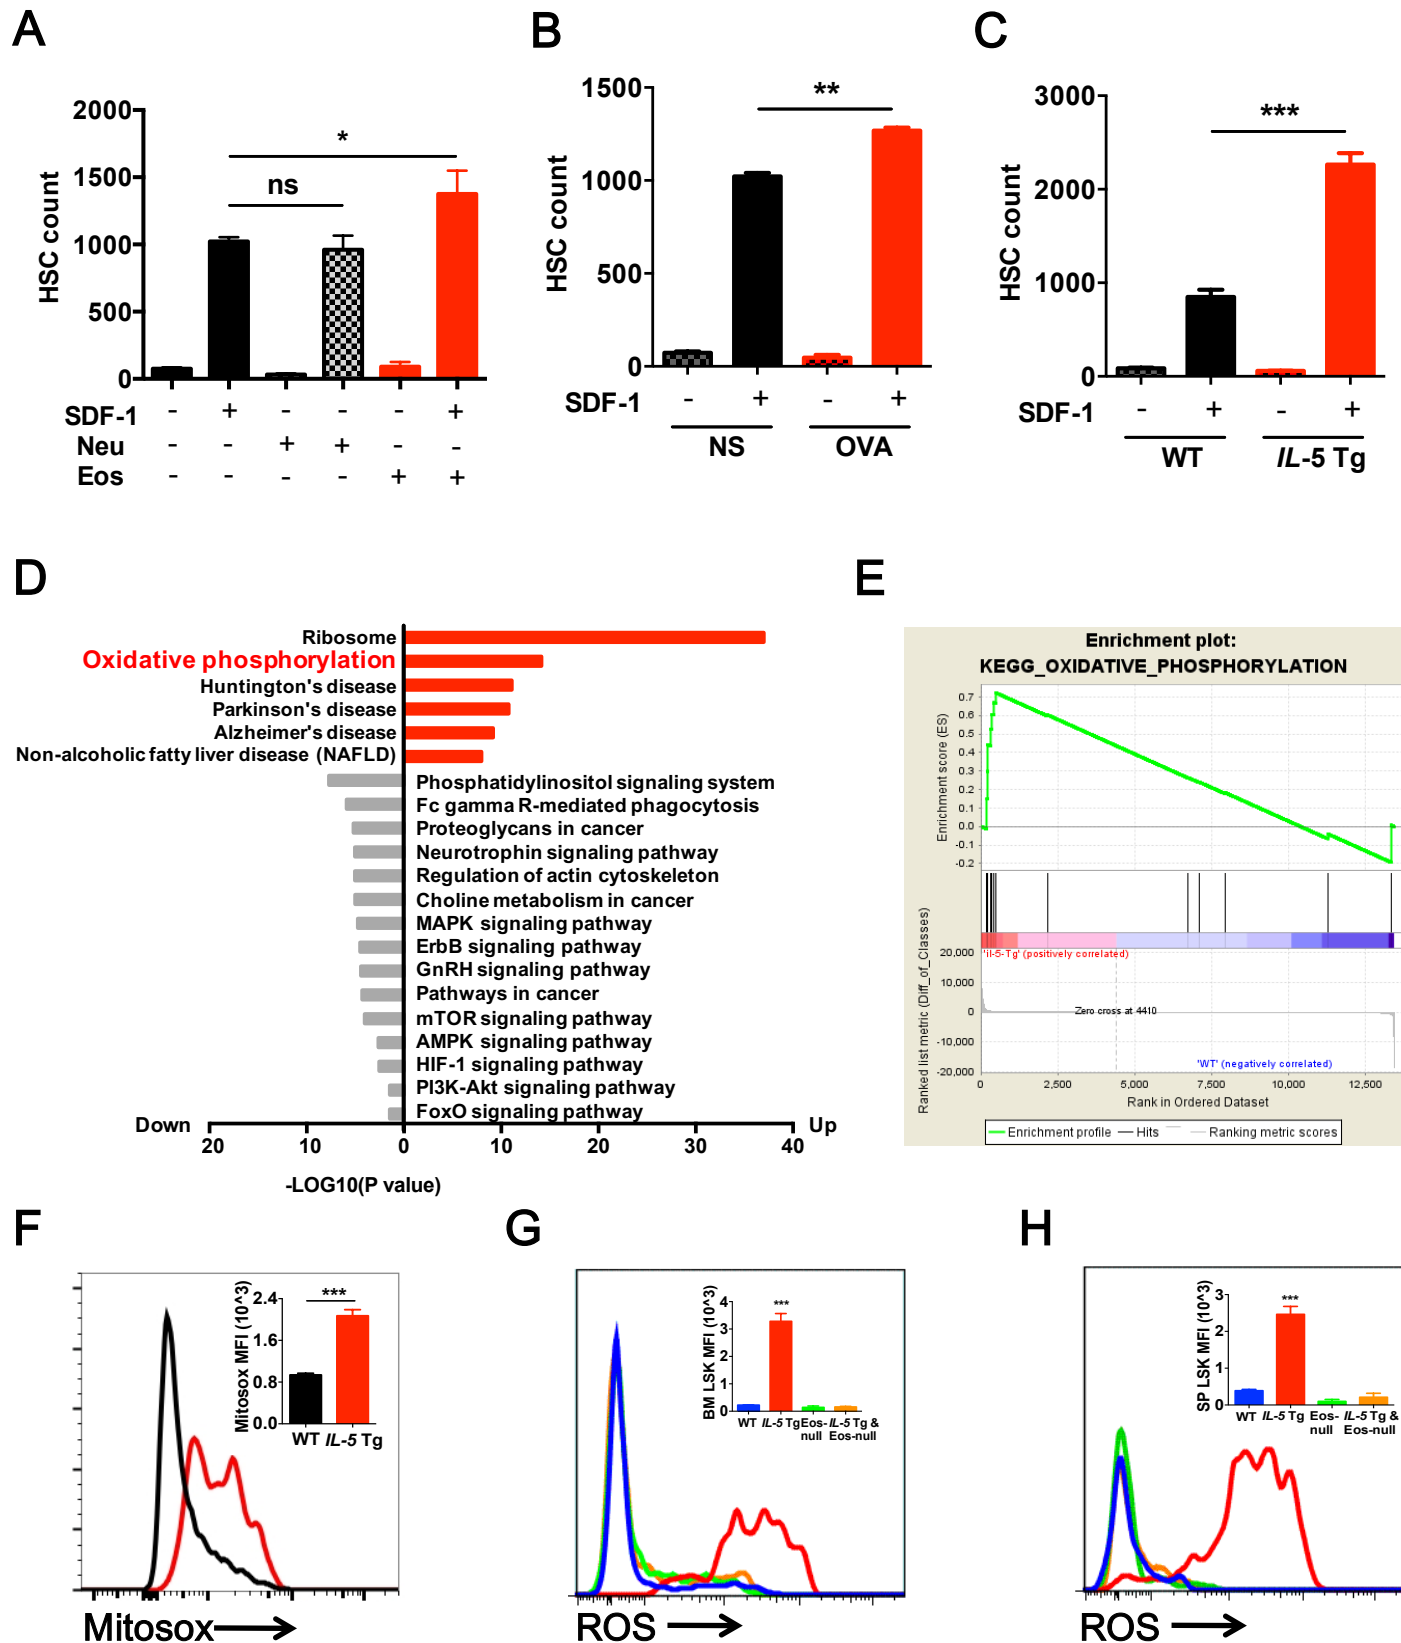

**Supplemental Figure S5** Eos-induced intracellular ROS accumulation in HSCs is responsible for disrupted HSC homeostasis.

(A) HSCs sorted from WT mice and cocultured with Neu/Eos or SDF-1 (200 ng/ml). Number of HSCs that had migrated from upper wells was counted after 12 h culture *in vitro*. (B, C) HSC migration assay performed with HSCs sorted from the BM of OVA mice and *Il-5* Tg mice following SDF-1 treatment. The number of HSCs that had migrated from upper wells was counted after 12 h culture *in vitro*. (D, E) KEGG (D) and GSEA (E) Pathway analysis shows enrichment of the oxidative phosphorylation pathway in *Il-5* Tg versus WT cells (FDR<0.05). (F) Mitosox MFI analysis in HSCs from WT and *Il-5* Tg mice. (G, H) ROS MFI analysis in the BM and SP HSCs from the double-transgenic mice. Data are shown as the means  $\pm$  SEM with at least 6 samples per group. ns: not significant, \*p < 0.05, \*\*p < 0.01, \*\*\*p < 0.001 versus respective controls.
