# Supplementary material for: Eosinophil-derived CCL-6 impairs hematopoietic stem cell homeostasis
Source: PubMed Central journal article supplement (PMC5835778; doi:10.1038/cr.2018.2), 2018-01-12
Supplement: cr20182x6.pdf [file cr20182x6.pdf]

Supplementary Figure 6: Eos are the major cause in *IL-5* Tg and OVA-treated mice.

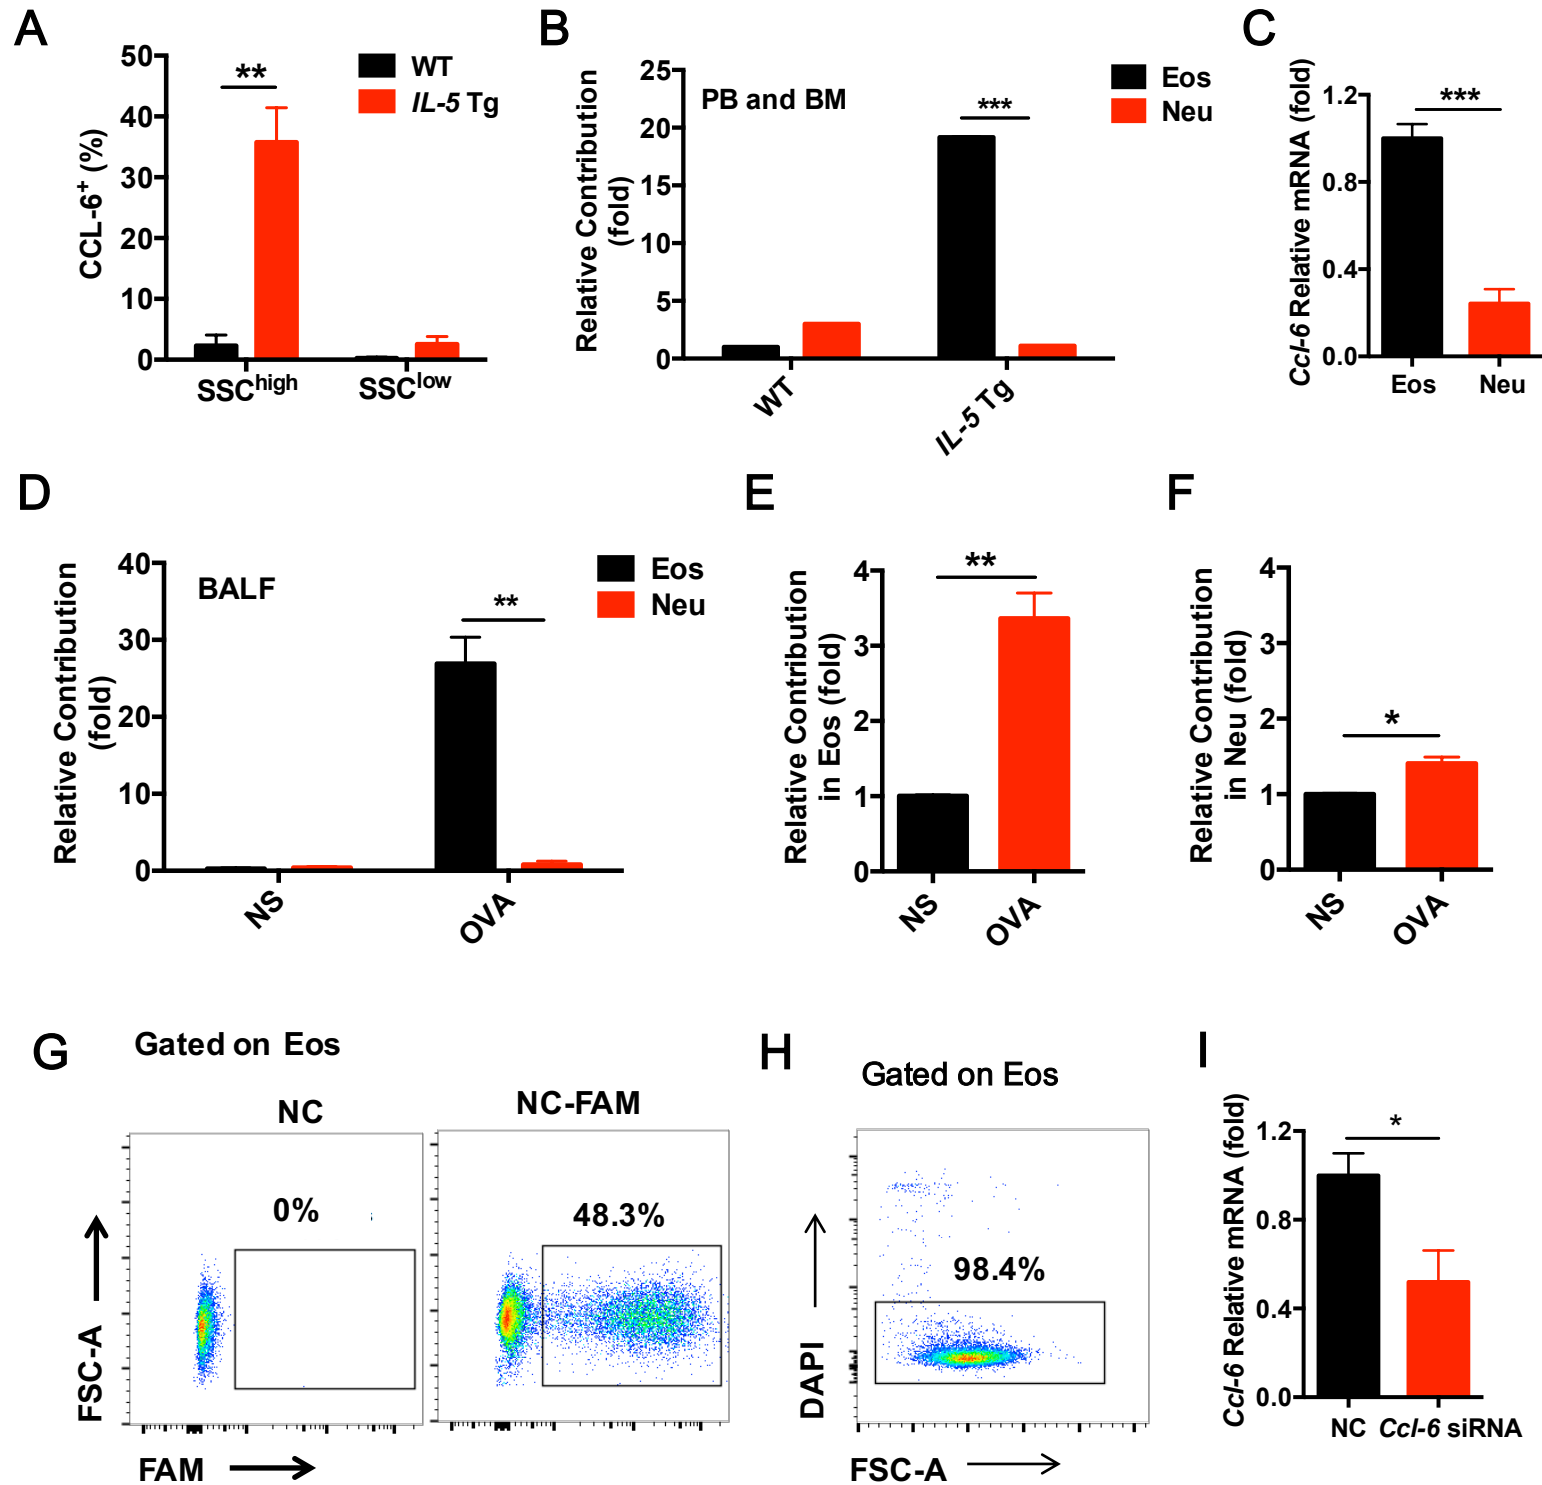

**Supplemental Figure S6** Eos are the major cause in *Il-5* Tg and OVA-treated mice.

(A) Percentage of CCL-6<sup>+</sup> cells in the BM SSC<sub>high</sub> and SSC<sub>low</sub> from WT and *Il-5* Tg mice. (B) Relative contribution of Eos and neutrophils on CCL-6 expression from PB and BM in WT and *Il-5* Tg mice. (C, D) Relative contribution of Eos and neutrophils on CCL-6 expression from BALF in OVA-treated mice. (E, F) CCL-6 relative contribution of Eos and Neu in the BM and PB of OVA-treated mice, respectively. (G) Transfected efficiency of Eos performed with negative control siRNA (NC) with FAM fluorescence after 5 h. (H) Representative FACS plots of the percentage of surviving Eos after transfection and culture for 12 h. (I) *Ccl-6* mRNA expression in transfected Eos following negative control siRNA or *Ccl-6* siRNA transfection. Data are shown as the means  $\pm$  SEM with at least 4 samples per group. \*p < 0.05, \*\*p < 0.01, \*\*\*p < 0.001 versus respective controls.
