# Supplementary material for: Eosinophil-derived CCL-6 impairs hematopoietic stem cell homeostasis
Source: PubMed Central journal article supplement (PMC5835778; doi:10.1038/cr.2018.2), 2018-01-12
Supplement: cr20182x7.pdf [file cr20182x7.pdf]

Supplementary Figure 7: CCL-6 neutralizing antibody alleviated airway inflammation in OVA-treated mice.

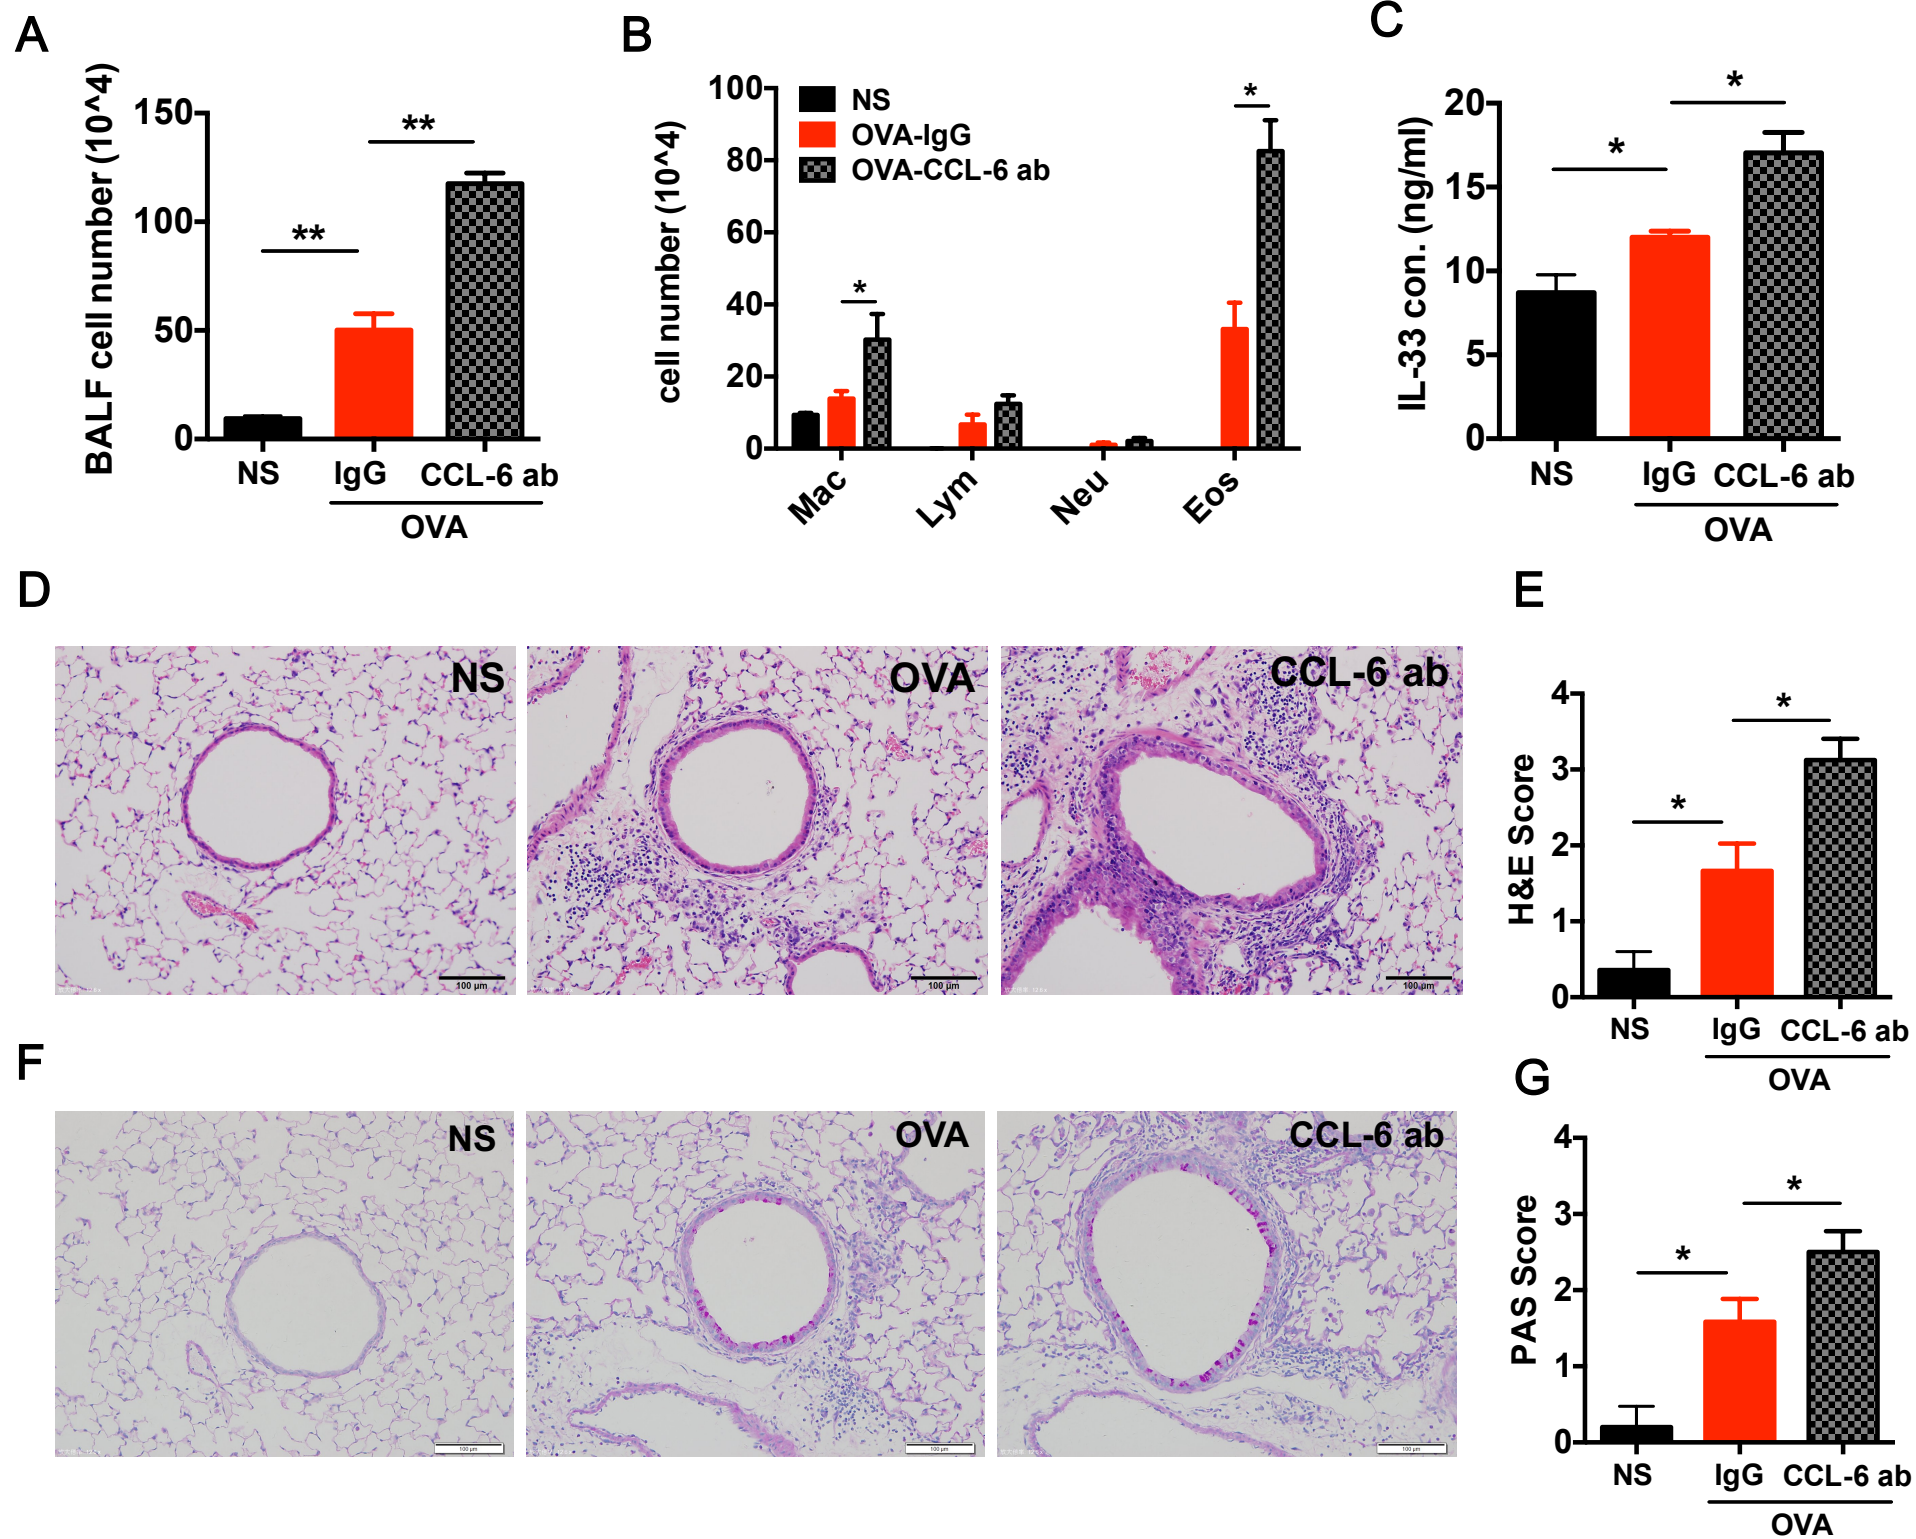

**Supplemental Figure S7** CCL-6 neutralizing antibody alleviated airway inflammation in OVA-treated mice.

**(A)** Total inflammatory cell quantification in the bronchoalveolar lavage fluid (BALF) from CCL-6 neutralizing antibody treat OVA mice (OVA CCL-6 ab), negative IgG control mice (OVA IgG). **(B)** Cell populations and quantification of BALF cells with Wright-Giemsa staining under a microscopy of 400 times amplification. **(C)** IL-33 levels in the lung homogenates determined with ELISA in the CCL-6 antibody-treated and their control mice. **(D, F)** Representative H&E (D) and PAS (F) staining of lung pathological sections (Bars: 100  $\mu$ m). **(E, G)** Evaluation of scores on lung H&E and PAS sections in a double-blinded test by three individuals. Data are shown as the means  $\pm$  SEM with at least 6 samples per group. \* $p < 0.05$ , \*\* $p < 0.01$  versus respective controls.
